# Supplementary material for: Identifying shared genetic loci and common risk genes of rheumatoid arthritis associated with three autoimmune diseases based on large-scale cross-trait genome-wide association studies
Source: Front Immunol. 2023 Jun 12;14:1160397. doi: 10.3389/fimmu.2023.1160397 (PMC10291128; doi:10.3389/fimmu.2023.1160397)
Supplement: Supplementary file 4 [file Table_4.xlsx]

## Sheet: RA-MAGMA_result
Significant genes of rheumatoid arthritis detected by MAGMA （P_MAGMA <= 2.57E-6）
Gene_ID	Gene_alias	Chr	Start	Stop	N_snps	Z-stat_gene	p_gene	Reported_or_not
7148	TNXB	6	32008932	32077151	73	15.089	9.63e-52	Yes
56244	BTNL2	6	32362513	32374900	39	14.632	8.77e-49	Yes
10665	TSBP1	6	32260475	32339705	178	13.942	1.77e-44	Yes
3122	HLA-DRA	6	32407619	32412823	51	12.985	7.42e-39	Yes
1388	ATF6B	6	32083045	32096017	16	12.103	5.1e-34	Yes
9374	PPT2	6	32121229	32131458	11	11.998	1.83e-33
177	AGER	6	32148745	32152099	10	11.85	1.08e-32
717	C2	6	31865562	31913449	30	11.814	1.64e-32	Yes
10919	EHMT2	6	31847536	31865464	20	11.8	1.96e-32	Yes
3119	HLA-DQB1	6	32627241	32634466	12	11.767	2.89e-32	Yes
4855	NOTCH4	6	32162620	32191844	71	11.02	1.52e-28	Yes
80864	EGFL8	6	32132382	32136062	9	10.642	9.51e-27
629	CFB	6	31913721	31919861	24	10.556	2.38e-26
7916	PRRC2A	6	31588450	31605554	50	10.526	3.28e-26	Yes
6499	SKIC2	6	31926581	31937532	24	10.472	5.81e-26
101929163	TSBP1-AS1	6	32371234	32373967	12	10.373	1.65e-25	Yes
199	AIF1	6	31582969	31584798	4	10.228	7.41e-25
5089	PBX2	6	32152510	32157963	7	9.8137	4.92e-23	Yes
7936	NELFE	6	31919864	31926864	9	9.6733	1.96e-22
6891	TAP2	6	32789610	32806547	48	9.6286	3.03e-22	Yes
3123	HLA-DRB1	6	32546546	32557613	12	9.4539	1.63e-21	Yes
3118	HLA-DQA2	6	32709156	32714664	22	8.7016	1.64e-18	Yes
3305	HSPA1L	6	31777396	31790093	18	8.5917	4.28e-18	Yes
7917	BAG6	6	31606805	31620953	26	8.5346	7.03e-18	Yes
1589	CYP21A2	6	32006093	32009447	2	8.3849	2.54e-17	Yes
57827	C6orf47	6	31626075	31628549	6	8.345	3.56e-17	Yes
8859	STK19	6	31938952	31949223	14	7.858	1.95e-15	Yes
7920	ABHD16A	6	31654726	31671137	14	7.6602	9.28e-15	Yes
6293	VPS52	6	33218049	33239723	12	7.4456	4.83e-14	Yes
9277	WDR46	6	33246682	33257304	11	7.4195	5.88e-14
80736	SLC44A4	6	31830969	31846823	30	7.3905	7.32e-14	Yes
6048	RNF5	6	32146162	32148570	7	7.2639	1.88e-13	Yes
100507436	MICA	6	31367561	31383090	38	7.1957	3.11e-13	Yes
7918	GPANK1	6	31629006	31634060	16	7.1564	4.14e-13	Yes
63940	GPSM3	6	32158543	32163300	7	7.1424	4.58e-13	Yes
63943	FKBPL	6	32096484	32098067	4	7.1248	5.21e-13	Yes
80741	LY6G5C	6	31644461	31648150	4	7.1202	5.39e-13	Yes
3303	HSPA1A	6	31782952	31785719	3	6.9824	1.45e-12	Yes
6222	RPS18	6	33239852	33244281	7	6.8945	2.7e-12	Yes
1460	CSNK2B	6	31632995	31637844	8	6.8767	3.06e-12	Yes
259215	LY6G6F	6	31674625	31678372	5	6.832	4.19e-12	Yes
7919	DDX39B	6	31497996	31510252	40	6.8104	4.87e-12	Yes
10554	AGPAT1	6	32135983	32145888	12	6.8081	4.94e-12	Yes
4439	MSH5	6	31707725	31730455	29	6.6471	1.49e-11	Yes
3111	HLA-DOA	6	32971959	32977389	25	6.6079	1.95e-11	Yes
4795	NFKBIL1	6	31514628	31526606	15	6.5975	2.09e-11	Yes
9278	ZBTB22	6	33282182	33285719	4	6.5877	2.23e-11
1797	DXO	6	31937588	31940032	12	6.5674	2.56e-11
3117	HLA-DQA1	6	32605169	32612152	8	6.5393	3.09e-11	Yes
8831	SYNGAP1	6	33387847	33421466	12	6.5108	3.74e-11
5252	PHF1	6	33378773	33384230	5	6.3398	1.15e-10	Yes
50854	SNHG32	6	31802693	31807541	10	6.3213	1.3e-10
6892	TAPBP	6	33267471	33282164	10	6.3073	1.42e-10	Yes
534	ATP6V1G2	6	31512228	31514625	9	6.2504	2.05e-10	Yes
3107	HLA-C	6	31236526	31239913	10	6.0436	7.54e-10	Yes
3113	HLA-DPA1	6	33032346	33048555	28	6.0354	7.93e-10	Yes
135656	MUCL3	6	30908777	30921998	22	5.9987	9.95e-10
4049	LTA	6	31539876	31542101	6	5.979	1.12e-09	Yes
401250	MCCD1	6	31496739	31498008	8	5.9578	1.28e-09	Yes
5698	PSMB9	6	32821927	32827628	16	5.9252	1.56e-09	Yes
26191	PTPN22	1	114356433	114414375	7	5.9156	1.65e-09	Yes
10107	TRIM10	6	30119722	30128711	24	5.7286	5.06e-09
3833	KIFC1	6	33359301	33377701	15	5.7102	5.64e-09	Yes
170679	PSORS1C1	6	31082608	31107869	110	5.6556	7.76e-09	Yes
5696	PSMB8	6	32808494	32812712	7	5.6433	8.34e-09	Yes
7940	LST1	6	31553956	31556686	4	5.5802	1.2e-08	Yes
4277	MICB	6	31462054	31478901	28	5.5783	1.21e-08
79722	ANKRD55	5	55395507	55529186	40	5.5694	1.28e-08	Yes
4050	LTB	6	31548335	31550202	1	5.5391	1.52e-08
11074	TRIM31	6	30070674	30080867	31	5.4902	2.01e-08	Yes
100507679	MUC22	6	30973729	31003179	91	5.4586	2.4e-08	Yes
3120	HLA-DQB2	6	32723837	32731330	17	5.441	2.65e-08	Yes
7124	TNF	6	31543344	31546113	5	5.4399	2.67e-08	Yes
1616	DAXX	6	33286335	33290793	7	5.3782	3.76e-08	Yes
394263	MUC21	6	30951485	30957675	15	5.3736	3.86e-08
221527	ZBTB12	6	31867394	31869769	5	5.3636	4.08e-08	Yes
57176	VARS2	6	30881982	30894236	33	5.2931	6.01e-08	Yes
10471	PFDN6	6	33257374	33258711	2	5.2404	8.01e-08
3109	HLA-DMB	6	32902406	32908847	16	5.1925	1.04e-07	Yes
3108	HLA-DMA	6	32916391	32920900	6	5.1858	1.08e-07	Yes
135644	TRIM40	6	30103885	30116512	45	5.0815	1.87e-07	Yes
6046	BRD2	6	32936437	32949282	23	5.0738	1.95e-07	Yes
80739	MPIG6B	6	31691121	31694487	5	4.9855	3.09e-07	Yes
389376	SFTA2	6	30899127	30899952	6	4.9768	3.23e-07	Yes
170680	PSORS1C2	6	31105311	31107127	15	4.9719	3.32e-07
5863	RGL2	6	33259431	33267386	4	4.925	4.22e-07	Yes
7726	TRIM26	6	30152232	30181271	35	4.8439	6.37e-07	Yes
221496	LEMD2	6	33738990	33756906	5	4.8104	7.53e-07	Yes
3115	HLA-DPB1	6	33043703	33057473	55	4.76	9.68e-07	Yes
51596	CUTA	6	33384319	33386111	2	4.7279	1.13e-06
80740	LY6G6C	6	31686425	31689511	10	4.7159	1.2e-06	Yes
401251	SAPCD1	6	31730773	31732627	8	4.7098	1.24e-06
3106	HLA-B	6	31321649	31324989	7	4.678	1.45e-06
Threshold p-value
	P	number of genes	threshold
	0.05	19427	2.57374e-06
The last column represents whether the genes were reported associated with rheumatoid arthritis in GWAS-catalog or previous research.

## Sheet: MS-MAGMA_result
Significant genes of multiple sclerosis detected by MAGMA （P_MAGMA <= 2.57E-6）
Gene_ID	Gene_alias	Chr	Start	Stop	N_snps	Z-stat_gene	p_gene	Reported_or_not
3123	HLA-DRB1	6	32546546	32557613	12	14.941	8.98e-51	Yes
3122	HLA-DRA	6	32407619	32412823	51	13.276	1.6e-40	Yes
7148	TNXB	6	32008932	32077151	73	13.194	4.74e-40	Yes
9374	PPT2	6	32121229	32131458	11	12.747	1.62e-37
4855	NOTCH4	6	32162620	32191844	71	11.723	4.84e-32
10665	TSBP1	6	32260475	32339705	178	11.448	1.2e-30	Yes
177	AGER	6	32148745	32152099	10	11.246	1.22e-29	Yes
7917	BAG6	6	31606805	31620953	26	11.176	2.68e-29
629	CFB	6	31913721	31919861	24	11.144	3.84e-29
6499	SKIC2	6	31926581	31937532	24	10.709	4.6e-27
10919	EHMT2	6	31847536	31865464	20	9.9815	9.18e-24	Yes
10554	AGPAT1	6	32135983	32145888	12	9.8015	5.55e-23
56244	BTNL2	6	32362513	32374900	39	9.7341	1.08e-22	Yes
80736	SLC44A4	6	31830969	31846823	30	9.4158	2.35e-21
63940	GPSM3	6	32158543	32163300	7	9.1561	2.69e-20
7916	PRRC2A	6	31588450	31605554	50	9.088	5.04e-20
3118	HLA-DQA2	6	32709156	32714664	22	9.0493	7.2e-20
7919	DDX39B	6	31497996	31510252	40	8.1882	1.33e-16
8859	STK19	6	31938952	31949223	14	7.9334	1.07e-15
7936	NELFE	6	31919864	31926864	9	7.6127	1.34e-14
401250	MCCD1	6	31496739	31498008	8	7.5152	2.84e-14	Yes
3120	HLA-DQB2	6	32723837	32731330	17	7.4858	3.56e-14
717	C2	6	31865562	31913449	30	7.4517	4.61e-14
3305	HSPA1L	6	31777396	31790093	18	7.3971	6.96e-14
3119	HLA-DQB1	6	32627241	32634466	12	7.377	8.09e-14	Yes
6046	BRD2	6	32936437	32949282	23	7.304	1.4e-13	Yes
1589	CYP21A2	6	32006093	32009447	2	7.3033	1.4e-13
1388	ATF6B	6	32083045	32096017	16	7.2756	1.72e-13
6891	TAP2	6	32789610	32806547	48	7.0101	1.19e-12	Yes
4277	MICB	6	31462054	31478901	28	6.9015	2.57e-12
4795	NFKBIL1	6	31514628	31526606	15	6.8703	3.2e-12
534	ATP6V1G2	6	31512228	31514625	9	6.7837	5.86e-12
170679	PSORS1C1	6	31082608	31107869	110	6.7578	7.01e-12	Yes
57827	C6orf47	6	31626075	31628549	6	6.7308	8.44e-12
3108	HLA-DMA	6	32916391	32920900	6	6.6193	1.8e-11	Yes
101929163	TSBP1-AS1	6	32371234	32373967	12	6.5491	2.89e-11	Yes
6048	RNF5	6	32146162	32148570	7	6.4906	4.27e-11
3303	HSPA1A	6	31782952	31785719	3	6.3111	1.39e-10
3107	HLA-C	6	31236526	31239913	10	6.2498	2.06e-10
6941	TCF19	6	31126303	31134183	26	6.2437	2.14e-10	Yes
54535	CCHCR1	6	31110216	31126015	58	6.1959	2.9e-10	Yes
7920	ABHD16A	6	31654726	31671137	14	6.1479	3.93e-10
1041	CDSN	6	31082865	31088252	38	6.1361	4.23e-10	Yes
5460	POU5F1	6	31132114	31138451	22	6.0119	9.17e-10
135656	MUCL3	6	30908777	30921998	22	5.9646	1.23e-09
10107	TRIM10	6	30119722	30128711	24	5.8428	2.57e-09
135644	TRIM40	6	30103885	30116512	45	5.7402	4.73e-09
100507679	MUC22	6	30973729	31003179	91	5.6918	6.28e-09
7726	TRIM26	6	30152232	30181271	35	5.6217	9.46e-09
4439	MSH5	6	31707725	31730455	29	5.5772	1.22e-08
3109	HLA-DMB	6	32902406	32908847	16	5.525	1.65e-08
11074	TRIM31	6	30070674	30080867	31	5.1959	1.02e-07	Yes
100507436	MICA	6	31367561	31383090	38	5.1868	1.07e-07
80740	LY6G6C	6	31686425	31689511	10	5.1298	1.45e-07
394263	MUC21	6	30951485	30957675	15	5.1195	1.53e-07	Yes
199	AIF1	6	31582969	31584798	4	5.1142	1.58e-07
170680	PSORS1C2	6	31105311	31107127	15	5.0431	2.29e-07	Yes
4340	MOG	6	29624758	29640149	24	4.9622	3.48e-07	Yes
50854	SNHG32	6	31802693	31807541	10	4.8734	5.48e-07
222696	ZSCAN23	6	28399373	28411279	14	4.775	8.99e-07
401251	SAPCD1	6	31730773	31732627	8	4.7424	1.06e-06
5698	PSMB9	6	32821927	32827628	16	4.6697	1.51e-06
29113	C6orf15	6	31079000	31080332	10	4.6494	1.66e-06	Yes
23274	CLEC16A	16	11038345	11276046	48	4.6346	1.79e-06	Yes
Threshold p-value
	P	number of genes	threshold
	0.05	19427	2.57374e-06
The last column represents whether the genes were reported associated with rheumatoid arthritis in GWAS-catalog or previous research.

## Sheet: IBD-MAGMA_result
Significant genes of inflammatory bowel disease detected by MAGMA（P_MAGMA <= 2.57E-6）
Gene_ID	Gene_alias	Chr	Start	Stop	N_snps	Z-stat_gene	p_gene	Reported_or_not
149233	IL23R	1	67604590	67725662	25	10.644	9.301e-27	Yes
3119	HLA-DQB1	6	32627241	32634466	12	6.7884	5.6703e-12	Yes
3717	JAK2	9	4985245	5129948	24	6.5502	2.8726e-11	Yes
56244	BTNL2	6	32362513	32374900	39	6.4735	4.7891e-11	Yes
3123	HLA-DRB1	6	32546546	32557613	12	6.4375	6.0725e-11	Yes
7936	NELFE	6	31919864	31926864	9	6.1033	5.1949e-10
11074	TRIM31	6	30070674	30080867	31	6.036	7.8986e-10
10919	EHMT2	6	31847536	31865464	20	5.9901	1.0482e-09
8624	PSMG1	21	40449076	40555440	33	5.968	1.2008e-09
8927	BSN	3	49591922	49708982	23	5.8346	2.6962e-09	Yes
64127	NOD2	16	50727507	50766990	15	5.6896	6.3654e-09	Yes
3586	IL10	1	206940948	206945839	4	5.676	6.8932e-09	Yes
6891	TAP2	6	32789610	32806547	48	5.519	1.7051e-08	Yes
55765	INAVA	1	200860627	200884864	10	5.445	2.5905e-08	Yes
3122	HLA-DRA	6	32407619	32412823	51	5.3901	3.5215e-08	Yes
4485	MST1	3	49721380	49726196	2	5.3586	4.1927e-08	Yes
1388	ATF6B	6	32083045	32096017	16	5.222	8.8481e-08
2212	FCGR2A	1	161475205	161489360	3	4.8032	7.8065e-07	Yes
2768	GNA12	7	2767739	2883963	29	4.7658	9.4072e-07	Yes
1605	DAG1	3	49506136	49573051	9	4.7315	1.1141e-06	Yes
22891	ZNF365	10	64133916	64431771	74	4.7222	1.1668e-06	Yes
100507436	MICA	6	31367561	31383090	38	4.7108	1.2338e-06
3135	HLA-G	6	29794756	29798899	6	4.5738	2.3942e-06	Yes
Threshold p-value
	P	number of genes	threshold
	0.05	19427	2.57374e-06
The last column represents whether the genes were reported associated with rheumatoid arthritis in GWAS-catalog or previous research.

## Sheet: T1D_MAGMA_result
Supplementary Table S12: Significant genes of T1D detected by MAGMA （P_MAGMA <= 2.57E-6）
GENE	SYMBOL	CHR	START	STOP	NSNPS	NPARAM	N	ZSTAT	P
100507436	MICA	6	31367561	31383090	155	31	181214	25.595	8.6053e-145
6891	TAP2	6	32789610	32806547	127	21	181214	23.412	1.6286e-121
3106	HLA-B	6	31321649	31324989	54	15	181214	23.037	9.97e-118
7148	TNXB	6	32008932	32077151	119	22	181214	22.461	5.047e-112
170680	PSORS1C2	6	31105311	31107127	17	8	181214	22.323	1.0989e-110
3305	HSPA1L	6	31777396	31790093	25	11	181214	22.209	1.3922e-109
3112	HLA-DOB	6	32780540	32784825	33	8	181214	21.762	2.65e-105
10554	AGPAT1	6	32135983	32145888	18	7	181214	21.369	1.3112e-101
7917	BAG6	6	31606805	31620953	31	8	181214	21.35	1.947e-101
4855	NOTCH4	6	32162620	32191844	108	19	181214	21.144	1.5789e-99
717	C2	6	31865562	31913449	82	15	181214	20.972	5.9077e-98
534	ATP6V1G2	6	31512228	31514625	8	5	181214	20.621	8.9051e-95
23564	DDAH2	6	31694817	31698039	6	3	181214	20.426	4.9545e-93
80737	VWA7	6	31733178	31745108	22	8	181214	20.102	3.544e-90
56244	BTNL2	6	32362513	32374900	109	12	181214	20.084	5.0636e-90
7916	PRRC2A	6	31588450	31605554	54	12	181214	19.915	1.5012e-88
7919	DDX39B	6	31497996	31510252	66	14	181214	19.911	1.6429e-88
10665	TSBP1	6	32260475	32339705	558	19	181214	19.212	1.4749e-82
3122	HLA-DRA	6	32407619	32412823	47	7	181214	19.139	6.0056e-82
1388	ATF6B	6	32083045	32096017	16	7	181214	18.883	7.908e-80
6499	SKIC2	6	31926581	31937532	21	7	181214	18.742	1.1199e-78
1797	DXO	6	31937588	31940032	6	3	181214	18.663	4.9078e-78
177	AGER	6	32148745	32152099	11	5	181214	18.641	7.4366e-78
4439	MSH5	6	31707725	31730455	45	10	181214	18.445	2.8643e-76
7407	VARS1	6	31745295	31763712	23	8	181214	18.324	2.6634e-75
57819	LSM2	6	31765169	31774761	23	9	181214	18.265	7.8093e-75
629	CFB	6	31913721	31919861	16	7	181214	18.219	1.8268e-74
10211	FLOT1	6	30695506	30710687	26	8	181214	18.181	3.6229e-74
50854	SNHG32	6	31802693	31807541	12	6	181214	18.173	4.1906e-74
4795	NFKBIL1	6	31514628	31526606	51	12	181214	18.109	1.3579e-73
29113	C6orf15	6	31079000	31080332	18	5	181214	18.006	8.7679e-73
3111	HLA-DOA	6	32971959	32977389	43	12	181214	17.888	7.3414e-72
9374	PPT2	6	32121229	32131458	16	6	181214	17.679	3.0427e-70
7940	LST1	6	31553956	31556686	7	4	181214	17.678	3.1118e-70
4277	MICB	6	31462054	31478901	161	15	181214	17.512	5.8532e-69
7936	NELFE	6	31919864	31926864	14	5	181214	17.478	1.0466e-68
170679	PSORS1C1	6	31082608	31107869	215	24	181214	17.332	1.3587e-67
80736	SLC44A4	6	31830969	31846823	51	9	181214	16.804	1.1318e-63
221545	C6orf136	6	30614816	30620987	10	5	181214	16.703	6.2296e-63
3108	HLA-DMA	6	32916391	32920900	17	6	181214	16.559	6.848e-62
80740	LY6G6C	6	31686425	31689511	6	3	181214	16.523	1.2454e-61
10919	EHMT2	6	31847536	31865464	26	10	181214	16.437	5.1814e-61
63943	FKBPL	6	32096484	32098067	6	3	181214	16.205	2.3137e-59
135656	MUCL3	6	30908777	30921998	27	9	181214	16.142	6.5152e-59
389376	SFTA2	6	30899127	30899952	9	3	181214	16.04	3.3525e-58
3118	HLA-DQA2	6	32709156	32714664	48	7	181214	15.985	8.1013e-58
1192	CLIC1	6	31698358	31705095	5	2	181214	15.673	1.1522e-55
79969	ATAT1	6	30594613	30614598	53	11	181214	15.559	6.8781e-55
6046	BRD2	6	32936437	32949282	52	10	181214	15.481	2.3322e-54
1302	COL11A2	6	33130469	33160245	86	12	181214	15.475	2.5734e-54
56658	TRIM39	6	30294227	30311506	34	10	181214	15.388	9.8109e-54
63940	GPSM3	6	32158543	32163300	7	2	181214	15.353	1.7038e-53
780	DDR1	6	30850694	30867933	41	6	181214	15.338	2.139e-53
221527	ZBTB12	6	31867394	31869769	5	3	181214	15.248	8.5004e-53
11074	TRIM31	6	30070674	30080867	73	18	181214	15.192	2.0069e-52
8859	STK19	6	31938952	31949223	17	6	181214	15.026	2.4874e-51
8354	H3C11	6	27839623	27840099	1	1	181214	14.933	1e-50
8356	H3C12	6	27858093	27858570	1	1	181214	14.933	1e-50
3117	HLA-DQA1	6	32605169	32612152	1	1	181214	14.933	1e-50
3107	HLA-C	6	31236526	31239913	57	10	181214	14.933	1.0124e-50
7920	ABHD16A	6	31654726	31671137	17	7	181214	14.868	2.6462e-50
2968	GTF2H4	6	30875957	30881883	19	4	181214	14.799	7.4179e-50
58496	LY6G5B	6	31638728	31640227	4	2	181214	14.782	9.5381e-50
5460	POU5F1	6	31132114	31138451	56	11	181214	14.772	1.1085e-49
80864	EGFL8	6	32132382	32136062	7	2	181214	14.767	1.1896e-49
202658	TRIM39-RPP21	6	30297088	30314635	44	11	181214	14.709	2.8074e-49
4049	LTA	6	31539876	31542101	7	2	181214	14.61	1.2182e-48
4340	MOG	6	29624758	29640149	45	12	181214	14.585	1.7529e-48
80863	PRRT1	6	32116140	32119720	1	1	181214	14.549	2.9702e-48
8870	IER3	6	30710976	30712327	3	2	181214	14.518	4.6788e-48
57827	C6orf47	6	31626075	31628549	4	2	181214	14.42	1.923e-47
6048	RNF5	6	32146162	32148570	10	3	181214	14.322	7.9266e-47
80739	MPIG6B	6	31691121	31694487	3	2	181214	14.31	9.4753e-47
1460	CSNK2B	6	31632995	31637844	11	5	181214	14.222	3.3229e-46
100507679	MUC22	6	30973729	31003179	346	27	181214	14.057	3.4657e-45
5089	PBX2	6	32152510	32157963	9	4	181214	14.031	5.0188e-45
54535	CCHCR1	6	31110216	31126015	151	21	181214	13.996	8.2933e-45
3009	H1-5	6	27834570	27835359	4	2	181214	13.993	8.5732e-45
3119	HLA-DQB1	6	32627241	32634466	5	2	181214	13.976	1.0894e-44
3115	HLA-DPB1	6	33043703	33057473	196	11	181214	13.916	2.5348e-44
6941	TCF19	6	31126303	31134183	50	10	181214	13.893	3.4738e-44
11120	BTN2A1	6	26458132	26476849	71	14	181214	13.771	1.8944e-43
259197	NCR3	6	31556660	31560762	11	4	181214	13.749	2.5691e-43
8368	H4C13	6	27840926	27841289	1	1	181214	13.653	9.6734e-43
8341	H2BC15	6	27805544	27821533	23	4	181214	13.641	1.1445e-42
8348	H2BC17	6	27861203	27926100	99	19	181214	13.627	1.3906e-42
3303	HSPA1A	6	31782952	31785719	3	1	181214	13.561	3.4246e-42
9656	MDC1	6	30667584	30685458	57	10	181214	13.553	3.8225e-42
3120	HLA-DQB2	6	32723837	32731330	50	4	181214	13.277	1.5714e-40
101929163	TSBP1-AS1	6	32371234	32373967	29	3	181214	13.208	3.9234e-40
440603	BCL2L15	1	114419436	114430230	17	4	181214	13.151	8.4429e-40
199	AIF1	6	31582969	31584798	8	4	181214	13.078	2.2122e-39
401250	MCCD1	6	31496739	31498008	19	6	181214	12.985	7.4493e-39
10385	BTN2A2	6	26383111	26395102	49	10	181214	12.598	1.0867e-36
10745	PHTF1	1	114239824	114302165	80	7	181214	12.576	1.4222e-36
7726	TRIM26	6	30152232	30181271	109	16	181214	12.504	3.5463e-36
5696	PSMB8	6	32808494	32812712	21	5	181214	12.237	9.9055e-35
7745	ZKSCAN8	6	28109688	28127250	43	6	181214	12.209	1.3888e-34
3105	HLA-A	6	29910247	29913661	41	10	181214	12.119	4.1893e-34
346171	ZFP57	6	29640169	29644931	17	7	181214	12.078	6.9168e-34
85236	H2BC12	6	27106072	27114637	12	5	181214	12.038	1.1236e-33
387032	ZKSCAN4	6	28212404	28227030	28	8	181214	11.959	2.9076e-33
54665	RSBN1	1	114304454	114355070	45	7	181214	11.896	6.231e-33
1589	CYP21A2	6	32006093	32009447	8	3	181214	11.89	6.6994e-33
260425	MAGI3	1	113933087	114228545	431	24	181214	11.827	1.4123e-32
259215	LY6G6F	6	31674625	31678372	6	3	181214	11.826	1.4341e-32
3710	ITPR3	6	33587951	33664351	279	31	181214	11.709	5.738e-32
170954	PPP1R18	6	30644166	30655672	23	6	181214	11.703	6.1662e-32
7922	SLC39A7	6	33168603	33172214	2	1	181214	11.526	4.8764e-31
64288	ZSCAN31	6	28292514	28321972	91	14	181214	11.503	6.3823e-31
394263	MUC21	6	30951485	30957675	29	8	181214	11.374	2.8106e-30
26191	PTPN22	1	114356433	114414375	72	8	181214	11.364	3.1742e-30
114821	SCAND3	6	28539407	28555112	26	8	181214	11.362	3.2291e-30
3134	HLA-F	6	29691117	29695073	32	6	181214	11.265	9.7174e-30
64858	DCLRE1B	1	114447915	114456708	7	2	181214	11.252	1.1344e-29
80352	RNF39	6	30038043	30043628	43	7	181214	11.198	2.0851e-29
55937	APOM	6	31620187	31625987	11	4	181214	11.166	2.9915e-29
257202	GPX6	6	28471073	28483570	42	10	181214	11.058	1.0013e-28
203068	TUBB	6	30688012	30693199	17	5	181214	11.034	1.31e-28
7124	TNF	6	31543344	31546113	4	2	181214	10.989	2.1575e-28
8294	H4C9	6	27106924	27108258	2	1	181214	10.925	4.3937e-28
2065	ERBB3	12	56473809	56497291	24	5	181214	10.864	8.5093e-28
6890	TAP1	6	32812986	32821748	82	9	181214	10.806	1.6038e-27
1041	CDSN	6	31082865	31088252	43	6	181214	10.767	2.4711e-27
8449	DHX16	6	30620896	30640830	32	7	181214	10.593	1.5972e-26
7918	GPANK1	6	31629006	31634060	15	5	181214	10.576	1.928e-26
80741	LY6G5C	6	31644461	31648150	3	2	181214	10.561	2.2578e-26
80345	ZSCAN16	6	28092334	28097864	11	3	181214	10.526	3.2851e-26
81697	OR2B2	6	27878963	27880174	3	1	181214	10.501	4.2547e-26
84547	PGBD1	6	28249314	28270326	55	10	181214	10.474	5.7058e-26
8340	H2BC13	6	27775257	27775709	2	1	181214	10.456	6.8565e-26
3630	INS	11	2181009	2182439	2	1	181214	10.42	1e-25
2794	GNL1	6	30509154	30525371	23	7	181214	10.374	1.6255e-25
30834	POLR1H	6	30029017	30032686	23	5	181214	10.354	2.0083e-25
80317	ZKSCAN3	6	28317691	28336954	56	10	181214	10.278	4.4491e-25
8332	H2AC16	6	27833107	27833576	2	1	181214	10.188	1.1225e-24
6257	RXRB	6	33161362	33168630	10	4	181214	10.144	1.753e-24
7746	ZSCAN9	6	28193029	28201265	24	6	181214	10.13	2.0322e-24
10471	PFDN6	6	33257374	33258711	1	1	181214	10.113	2.419e-24
10279	PRSS16	6	27215480	27224399	16	6	181214	10.023	6.0426e-24
81797	OR12D3	6	29341200	29343068	11	5	181214	9.9875	8.643e-24
7741	ZSCAN26	6	28234788	28246001	17	4	181214	9.8179	4.7127e-23
55604	CARMIL1	6	25279656	25620758	1235	65	181214	9.7265	1.162e-22
7718	ZNF165	6	28048482	28057341	23	4	181214	9.6851	1.7436e-22
26716	OR2H1	6	29424947	29432099	14	5	181214	9.6359	2.8197e-22
26529	OR12D2	6	29364416	29365448	9	2	181214	9.6345	2.8582e-22
6821	SUOX	12	56391043	56399309	7	3	181214	9.33	5.2928e-21
79897	RPP21	6	30312897	30314635	10	4	181214	9.288	7.8571e-21
9753	ZSCAN12	6	28346598	28367544	59	7	181214	9.2138	1.5742e-20
2550	GABBR1	6	29570005	29600962	104	7	181214	9.1832	2.0917e-20
10717	AP4B1	1	114437370	114447741	10	2	181214	9.0035	1.0934e-19
6892	TAPBP	6	33267471	33282164	22	3	181214	8.7852	7.806e-19
723961	INS-IGF2	11	2150342	2182439	15	3	181214	8.7166	1.4337e-18
5869	RAB5B	12	56367697	56390467	37	4	181214	8.6633	2.2909e-18
3559	IL2RA	10	6052657	6104333	192	34	181214	8.6279	3.1237e-18
23274	CLEC16A	16	11038345	11276046	578	22	181214	8.5301	7.3109e-18
5987	TRIM27	6	28870779	28891768	53	10	181214	8.4905	1.0288e-17
3133	HLA-E	6	30457183	30461982	4	2	181214	8.4525	1.4258e-17
11118	BTN3A2	6	26365387	26378548	89	7	181214	8.4302	1.7261e-17
6992	PPP1R11	6	30034932	30038110	13	3	181214	8.4265	1.7814e-17
8343	H2BC7	6	26199787	26200216	4	2	181214	8.116	2.4086e-16
3109	HLA-DMB	6	32902406	32908847	33	4	181214	8.0849	3.1117e-16
10384	BTN3A3	6	26440700	26453643	27	6	181214	7.9351	1.0518e-15
9277	WDR46	6	33246682	33257304	18	4	181214	7.9086	1.301e-15
58530	LY6G6D	6	31683048	31685698	5	2	181214	7.8024	3.0378e-15
9278	ZBTB22	6	33282182	33285719	3	1	181214	7.7794	3.6426e-15
7932	OR2H2	6	29553818	29556745	9	4	181214	7.7698	3.9291e-15
150280	HORMAD2	22	30476453	30573064	152	18	181214	7.7174	5.9364e-15
8897	MTMR3	22	30279149	30426857	271	16	181214	7.6683	8.7141e-15
10475	TRIM38	6	25962917	25987557	44	11	181214	7.6579	9.4522e-15
401251	SAPCD1	6	31730773	31732627	4	2	181214	7.6517	9.9195e-15
26531	OR11A1	6	29393281	29424848	137	13	181214	7.6481	1.0202e-14
3833	KIFC1	6	33359301	33377701	30	6	181214	7.6337	1.1404e-14
6568	SLC17A1	6	25783125	25832287	139	14	181214	7.6248	1.2222e-14
57176	VARS2	6	30881982	30894236	51	4	181214	7.545	2.262e-14
11119	BTN3A1	6	26402465	26415444	53	5	181214	7.5125	2.8994e-14
578	BAK1	6	33540323	33548072	20	5	181214	7.4874	3.513e-14
84164	ASCC2	22	30184597	30234293	118	13	181214	7.4599	4.3302e-14
3304	HSPA1B	6	31789964	31798032	8	3	181214	7.4484	4.7229e-14
1616	DAXX	6	33286335	33290793	4	1	181214	7.3932	7.1693e-14
6231	RPS26	12	56435686	56438007	3	2	181214	7.3586	9.2939e-14
89870	TRIM15	6	30130968	30140473	58	7	181214	7.3521	9.7572e-14
11270	NRM	6	30655824	30659197	12	4	181214	7.3493	9.966e-14
10050	SLC17A4	6	25754927	25781403	101	14	181214	7.2861	1.5956e-13
23316	CUX2	12	111471828	111788358	282	18	181214	7.2607	1.9259e-13
55954	ZMAT5	22	30126945	30163000	102	9	181214	7.2539	2.025e-13
3113	HLA-DPA1	6	33032346	33048555	215	8	181214	7.2534	2.0323e-13
80742	PRR3	6	30524486	30532473	14	4	181214	7.2422	2.2077e-13
10786	SLC17A3	6	25845328	25874471	74	9	181214	7.2237	2.53e-13
696	BTN1A1	6	26500577	26510653	21	4	181214	7.1989	3.0345e-13
7923	HSD17B8	6	33172414	33174608	4	2	181214	7.169	3.7767e-13
5771	PTPN2	18	12785477	12884337	207	20	181214	7.1628	3.9537e-13
60468	BACH2	6	90636247	91006627	565	61	181214	7.1605	4.0195e-13
6293	VPS52	6	33218049	33239723	23	4	181214	7.1599	4.036e-13
8705	B3GALT4	6	33244917	33246602	1	1	181214	7.1476	4.4152e-13
8831	SYNGAP1	6	33387847	33421466	37	8	181214	7.1106	5.777e-13
4295	MLN	6	33762449	33771793	36	7	181214	7.0398	9.6234e-13
28973	MRPS18B	6	30585275	30594174	16	2	181214	7.0196	1.1125e-12
204851	HIPK1	1	114471819	114520491	41	6	181214	6.9495	1.8324e-12
10107	TRIM10	6	30119722	30128711	61	7	181214	6.9482	1.8504e-12
26707	OR2J2	6	29141311	29142351	7	2	181214	6.9266	2.1549e-12
53347	UBASH3A	21	43823971	43867790	179	20	181214	6.9186	2.2809e-12
164633	CABP7	22	30116344	30127822	30	7	181214	6.9034	2.538e-12
3077	HFE	6	26087422	26096438	17	6	181214	6.8955	2.6834e-12
29777	ABT1	6	26597171	26600278	14	4	181214	6.881	2.9708e-12
3481	IGF2	11	2150346	2179611	13	3	181214	6.8426	3.8873e-12
5781	PTPN11	12	112856536	112947717	35	6	181214	6.8275	4.3215e-12
222698	NKAPL	6	28227075	28228736	6	3	181214	6.7948	5.4221e-12
221496	LEMD2	6	33738990	33756906	58	7	181214	6.7248	8.7945e-12
8352	H3C3	6	26045639	26046097	3	2	181214	6.7206	9.0503e-12
3024	H1-1	6	26017260	26018040	3	2	181214	6.7112	9.6502e-12
222696	ZSCAN23	6	28399373	28411279	33	6	181214	6.7056	1.0028e-11
8970	H2BC11	6	27093912	27100743	7	3	181214	6.6705	1.2749e-11
8365	H4C8	6	26281278	26285844	12	3	181214	6.6663	1.3114e-11
3135	HLA-G	6	29794756	29798899	66	6	181214	6.6395	1.574e-11
8315	BRAP	12	112079950	112123790	26	4	181214	6.6379	1.5913e-11
3017	H2BC5	6	26157419	26171577	15	4	181214	6.6226	1.7651e-11
10666	CD226	18	67530192	67624412	140	21	181214	6.5742	2.4459e-11
8359	H4C1	6	26021907	26022278	2	1	181214	6.5125	3.6957e-11
6311	ATXN2	12	111890018	112037480	84	4	181214	6.5064	3.8489e-11
221504	ZBTB9	6	33422356	33425321	3	2	181214	6.4806	4.5687e-11
10019	SH2B3	12	111843720	111889427	26	2	181214	6.4519	5.5215e-11
10537	UBD	6	29523389	29527702	23	3	181214	6.4362	6.1258e-11
79692	ZNF322	6	26634611	26659980	67	8	181214	6.406	7.47e-11
1493	CTLA4	2	204732511	204738683	5	2	181214	6.3918	8.1978e-11
2880	GPX5	6	28493789	28502728	22	6	181214	6.3783	8.9529e-11
112869	SGF29	16	28565249	28603111	72	8	181214	6.3738	9.2204e-11
94026	POM121L2	6	27276842	27280011	8	4	181214	6.3429	1.1273e-10
64375	IKZF4	12	56401268	56432219	20	3	181214	6.3213	1.2968e-10
28955	DEXI	16	11022748	11036257	13	4	181214	6.305	1.4406e-10
6128	RPL6	12	112842994	112856647	9	3	181214	6.2613	1.9095e-10
135644	TRIM40	6	30103885	30116512	123	11	181214	6.2477	2.0824e-10
29796	UQCR10	22	30163358	30166402	5	2	181214	6.2357	2.2488e-10
387103	CENPW	6	126660660	126670548	9	3	181214	6.2325	2.2945e-10
10590	SCGN	6	25652429	25702011	147	23	181214	6.2275	2.3697e-10
144717	PHETA1	12	111798455	111806925	11	3	181214	6.2179	2.5197e-10
56944	OLFML3	1	114522030	114524875	3	2	181214	6.191	2.9898e-10
160762	CCDC63	12	111284757	111345339	138	17	181214	6.1869	3.0673e-10
5863	RGL2	6	33259431	33267386	2	1	181214	6.1365	4.2176e-10
25801	GCA	2	163200583	163236525	5	2	181214	6.099	5.3361e-10
6222	RPS18	6	33239852	33244281	10	3	181214	6.0874	5.7365e-10
282890	ZNF311	6	28962562	28973037	22	5	181214	6.0839	5.8634e-10
55911	APOBR	16	28505970	28510291	6	1	181214	6.0669	6.5197e-10
6799	SULT1A2	16	28603264	28611058	26	5	181214	6.0634	6.6622e-10
7738	ZNF184	6	27418521	27440897	76	6	181214	6.0601	6.802e-10
8935	SKAP2	7	26697397	27034862	753	19	181214	6.0486	7.3043e-10
10246	SLC17A2	6	25912982	25930954	53	7	181214	6.0358	7.909e-10
217	ALDH2	12	112204691	112247789	40	6	181214	6.0119	9.1656e-10
80724	ACAD10	12	112123857	112194911	50	4	181214	6.007	9.4472e-10
4074	M6PR	12	9092957	9102357	18	4	181214	5.8558	2.3737e-09
1201	CLN3	16	28488600	28505897	12	2	181214	5.8508	2.4463e-09
5698	PSMB9	6	32821927	32827628	21	4	181214	5.8061	3.1974e-09
1017	CDK2	12	56360556	56366573	6	3	181214	5.7791	3.7557e-09
116028	RMI2	16	11439311	11445617	35	6	181214	5.7152	5.4783e-09
85235	H2AC12	6	27114861	27115341	1	1	181214	5.7005	5.9711e-09
8550	MAPKAPK5	12	112280032	112331228	94	4	181214	5.6923	6.2679e-09
5252	PHF1	6	33378773	33384230	9	3	181214	5.6842	6.5732e-09
160365	CLECL1P	12	9868456	9885895	89	9	181214	5.6246	9.2946e-09
5236	PGM1	1	64058947	64125916	164	25	181214	5.6134	9.9221e-09
81696	OR5V1	6	29323007	29324054	5	2	181214	5.6048	1.0425e-08
89894	TMEM116	12	112369086	112451023	115	5	181214	5.6019	1.0598e-08
1911	PHC1	12	9067292	9094063	55	8	181214	5.5564	1.3769e-08
55423	SIRPG	20	1609522	1638425	97	14	181214	5.5427	1.4889e-08
79170	PRR15L	17	46029333	46035252	17	4	181214	5.5411	1.5031e-08
160760	PPTC7	12	110972237	111021064	34	7	181214	5.5407	1.506e-08
133690	CAPSL	5	35904397	35938881	103	13	181214	5.5372	1.5365e-08
25865	PRKD2	19	47177573	47220384	64	9	181214	5.4914	1.9934e-08
442191	OR14J1	6	29274467	29275432	1	1	181214	5.4545	2.4559e-08
326	AIRE	21	45705721	45718102	17	4	181214	5.4537	2.4664e-08
112812	FDX2	19	10420887	10427241	22	6	181214	5.4322	2.7828e-08
6817	SULT1A1	16	28616908	28634907	37	3	181214	5.4309	2.8028e-08
59067	IL21	4	123533783	123542212	16	6	181214	5.4286	2.8396e-08
284358	MAMSTR	19	49215999	49222976	10	1	181214	5.4255	2.889e-08
54922	RASIP1	19	49223842	49244136	25	2	181214	5.391	3.5036e-08
2625	GATA3	10	8087294	8117164	79	10	181214	5.3743	3.8447e-08
23	ABCF1	6	30539170	30559309	41	6	181214	5.3654	4.0379e-08
6015	RING1	6	33176286	33180499	5	2	181214	5.3651	4.0454e-08
80018	NAA25	12	112464493	112546826	75	9	181214	5.3547	4.2856e-08
3558	IL2	4	123372625	123377650	5	2	181214	5.3037	5.6745e-08
3586	IL10	1	206940948	206945839	9	3	181214	5.2825	6.3715e-08
124626	ZPBP2	17	38024417	38034149	31	3	181214	5.2779	6.5319e-08
10473	HMGN4	6	26538572	26547165	15	2	181214	5.2567	7.3317e-08
283234	CCDC88B	11	64107690	64125006	30	5	181214	5.2537	7.4524e-08
79600	TCTN1	12	111051832	111086935	32	7	181214	5.2313	8.4146e-08
201176	ARHGAP27	17	43471268	43510282	85	5	181214	5.1983	1.0058e-07
4771	NF2	22	29999545	30094589	139	14	181214	5.1765	1.1307e-07
11140	CDC37	19	10501809	10514271	18	6	181214	5.1642	1.2074e-07
9842	PLEKHM1	17	43513266	43568146	78	4	181214	5.1636	1.2115e-07
283450	HECTD4	12	112597992	112820113	148	9	181214	5.1542	1.2734e-07
6668	SP2	17	45973516	46006323	50	7	181214	5.1296	1.4516e-07
23271	CAMSAP2	1	200708686	200829832	210	19	181214	5.0497	2.2129e-07
6506	SLC1A2	11	35272752	35441610	460	31	181214	5.0473	2.2402e-07
2524	FUT2	19	49199228	49209191	3	1	181214	5.0267	2.4946e-07
116369	SLC26A8	6	35911291	35992413	180	20	181214	5.0189	2.5983e-07
8986	RPS6KA4	11	64126625	64139687	21	3	181214	5.0187	2.6009e-07
4982	TNFRSF11B	8	119935796	119964383	102	15	181214	5.0181	2.6094e-07
55163	PNPO	17	46018889	46026674	15	5	181214	5.0161	2.6371e-07
940	CD28	2	204571198	204603635	67	9	181214	4.9741	3.278e-07
51312	SLC25A37	8	23386363	23432976	220	20	181214	4.944	3.8265e-07
7297	TYK2	19	10461204	10491248	63	10	181214	4.9346	4.0162e-07
1504	CTRB1	16	75252884	75258822	23	5	181214	4.9136	4.4702e-07
55876	GSDMB	17	38060848	38074903	44	3	181214	4.8772	5.3799e-07
5141	PDE4A	19	10527449	10580307	73	8	181214	4.875	5.4393e-07
7142	TNP2	16	11361714	11363160	3	1	181214	4.8737	5.4767e-07
26471	NUPR1	16	28548662	28550495	3	2	181214	4.8524	6.099e-07
2841	GPR18	13	99906967	99910682	7	4	181214	4.8464	6.2866e-07
677	ZFP36L1	14	69254372	69263184	17	5	181214	4.8449	6.335e-07
51226	COPZ2	17	46103533	46120908	33	8	181214	4.8363	6.6135e-07
100125288	ZGLP1	19	10415479	10420233	9	4	181214	4.828	6.8962e-07
6711	SPTBN1	2	54683454	54898583	552	22	181214	4.8265	6.948e-07
2534	FYN	6	111981535	112194655	459	31	181214	4.796	8.0919e-07
222662	LHFPL5	6	35773071	35791852	31	3	181214	4.7958	8.1011e-07
442194	OR10C1	6	29407716	29408754	11	3	181214	4.7899	8.3447e-07
10961	ERP29	12	112451152	112461024	9	3	181214	4.7808	8.7298e-07
10906	TRAFD1	12	112563349	112591408	14	2	181214	4.7781	8.8498e-07
6732	SRPK1	6	35800811	35888957	164	6	181214	4.7668	9.3577e-07
79890	RIN3	14	92980125	93155339	548	68	181214	4.753	1.0022e-06
246778	IL27	16	28510683	28518155	10	2	181214	4.7494	1.0202e-06
6775	STAT4	2	191894302	192037404	238	29	181214	4.7226	1.1644e-06
28981	IFT81	12	110562140	110656600	91	14	181214	4.7096	1.2411e-06
488	ATP2A2	12	110719032	110788898	59	10	181214	4.7073	1.2551e-06
5409	PNMT	17	37824234	37826728	3	2	181214	4.6949	1.3335e-06
1512	CTSH	15	79214092	79237436	71	8	181214	4.6841	1.4058e-06
4853	NOTCH2	1	120454176	120639880	67	3	181214	4.6807	1.4292e-06
3633	INPP5B	1	38326369	38412729	128	12	181214	4.654	1.6279e-06
84461	NEURL4	17	7218947	7232644	2	1	181214	4.6244	1.8787e-06
2355	FOSL2	2	28615704	28637516	29	5	181214	4.6071	2.0417e-06
2289	FKBP5	6	35541362	35696360	221	21	181214	4.5965	2.1479e-06
3695	ITGB7	12	53585102	53601065	25	6	181214	4.5916	2.1997e-06
92170	MTG1	10	135207621	135234174	18	3	181214	4.584	2.2805e-06
55328	RNLS	10	90033621	90343611	578	30	181214	4.5802	2.3231e-06
136991	ASZ1	7	117003276	117067577	69	9	181214	4.5745	2.3868e-06
27161	AGO2	8	141541264	141645646	248	31	181214	4.5671	2.4724e-06
440387	CTRB2	16	75237994	75241072	6	3	181214	4.5618	2.5361e-06
Threshold p-value
	P	number of genes	threshold
	0.05	19427	2.57374e-06
