# Supplementary material for: Identifying shared genetic loci and common risk genes of rheumatoid arthritis associated with three autoimmune diseases based on large-scale cross-trait genome-wide association studies
Source: Front Immunol. 2023 Jun 12;14:1160397. doi: 10.3389/fimmu.2023.1160397 (PMC10291128; doi:10.3389/fimmu.2023.1160397)
Supplement: Supplementary file 9 [file Table_9.xlsx]

## Sheet: Risk_genes
Supplementary Table S4: Significant genes of AD, IBD and T1D detected by MAGMA and e-MAGMA
Gene_alias	Chr	Start	Stop	PubMed ID
				RA	MS	IBD	T1D
ZFP57	6	29640169	29644931
HLA-G	6	29794756	29798899				32541925、35893037
HLA-A	6	29910247	29913661	22190364	22190364		33179336、29404672
TRIM26	6	30152232	30181271
HLA-E	6	30457183	30461982
FLOT1	6	30695506	30710687				31537649
VARS2	6	30881982	30894236				31537649
PSORS1C1	6	31082608	31107869	34325607
PSORS1C2	6	31105311	31107127
CCHCR1	6	31110216	31126015		33143745、33143745	19915573	30718926
POU5F1	6	31132114	31138451			23266558	33179336、24509480、28869590、35551307
HLA-C	6	31236526	31239913			32072174	30718926、32541925
HLA-B	6	31321649	31324989		33143745	26192919	33385400、31451708
MICA	6	31367561	31383090	24532677			25936594
MICB	6	31462054	31478901			24837172
ATP6V1G2	6	31512228	31514625
NFKBIL1	6	31514628	31526606				30054458
LST1	6	31553956	31556686	30055863
AIF1	6	31582969	31584798
BAG6	6	31606805	31620953
GPANK1	6	31629006	31634060
LY6G5B	6	31638728	31640227
LY6G5C	6	31644461	31648150
MSH5	6	31707725	31730455
ZBTB12	6	31867394	31869769
STK19	6	31938952	31949223
C4A	6	31949834	31970457
C4B	6	31982572	32003195
CYP21A2	6	32006093	32009447				25249698
ATF6B	6	32083045	32096017
PRRT1	6	32116140	32119720
AGER	6	32148745	32152099				30863465
PBX2	6	32152510	32157963
NOTCH4	6	32162620	32191844	21505073		24837172	33179336
HLA-DRA*	6	32407619	32412823	24449572、26272072	20159113、23472185、23472185、22190364	28506689	33179336、19430480、31451708
HLA-DRB5	6	32485151	32498006	24782177、21156761、28118524、28118524、31596875	33143745		34594039
HLA-DRB1*	6	32546546	32557613	24532677、25014791、31596875、17804836、17554300	19525955、23472185、20598377、25616667、29521573	36077729、18758464	33179336、28566273、30297969
HLA-DQA1*	6	32605169	32612152	24532677、31596875、34594039、34594039、34594039	20453840、27386562、33143745、33143745、33143745	28067908、36077729、26192919、36077729、28008999	31669095、30254083、33179336、34594039
HLA-DQB1*	6	32627241	32634466	34594039、18794853、17554300、18668548、23918589	23472185、25616667、33143745、33143745、33143745	26192919	30054458、30254083、30254083、33179336
HLA-DQA2	6	32709156	32714664
HLA-DQB2	6	32723837	32731330
HLA-DOB	6	32780540	32784825	26272072			30054458
TAP2	6	32789610	32806547	26272072		34737426	33179336、25936594
TAP1	6	32812986	32821748	32534018
PSMB9	6	32821927	32827628
HLA-DMA	6	32916391	32920900
ZBTB22	6	33282182	33285719
DDAH2	6	31694817	31698039
VWA7	6	31733178	31745108
BRD2	6	32936437	32949282			28008999
TNXB	6	32008932	32077151		29769526	20848476
RNF5	6	32146162	32148570			30232010
BTNL2	6	32362513	32374900		23459443、23472185	19915573	25936594、35551307、35551307
ABCF1	6	30539170	30559309	28542262
LY6G6C	6	31686425	31689511
PPP1R18	6	30644166	30655672
SFTA2	6	30899127	30899952
MPIG6B	6	31691121	31694487
EHMT2	6	31847536	31865464
HSPA1L	6	31777396	31790093
NEU1	6	31826829	31830709
AGPAT1	6	32135983	32145888				32541925
VPS52	6	33218049	33239723
TRIM31	6	30070674	30080867				25936594、31451708、29404672
OR2H2	6	29553818	29556745
RNF39	6	30038043	30043628		33674311
NRM	6	30655824	30659197
CLIC1	6	31698358	31705095
SLC44A4	6	31830969	31846823			2641288
APOM	6	31620187	31625987	21844665
SYNGAP1	6	33387847	33421466
TRIM27	6	28870779	28891768				31451708
TSBP1*	6	32260475	32339705	20453842、21505073、24449572	18941528、22457343、20159113、23472185	23266558、23850713、28506689	33179336、28869590
GABBR1	6	29570005	29600962
PPP1R11	6	30034932	30038110
TRIM39-RPP21	6	30297088	30314635				33179336
RPP21	6	30312897	30314635				33179336
HLA-F	6	29691117	29695073	36762574	19525953
POLR1H	6	30029017	30032686
NELFE	6	31919864	31926864
TRIM40	6	30103885	30116512				29404672
RPS18	6	33239852	33244281
Asterisk (*) behind gene indicates that the corresponding gene has been reported to be associated with all of the four diseases in GWAS-catalog.
